# Supplementary material
Source: MDPI journal article supplement (https://www.mdpi.com/1424-2818/15/12/1223)
Supplement: s1 [file s1]

## Supplements

**Supplementary Table S1.** Comparison of TL for yellow and silver eels in different seasons using Dunn's multiple comparison post hoc test.

| comparison                                    | Z       | p unadjusted | p adjusted |
|-----------------------------------------------|---------|--------------|------------|
| Silver eels in autumn - Silver eels in winter | -1.5754 | 0.1152       | 1.0000     |
| Silver eels in autumn - Yellow eels in autumn | 2.2689  | 0.0233       | 0.2327     |
| Silver eels in winter - Yellow eels in autumn | 3.9894  | 0.0001       | 0.0007     |
| Silver eels in autumn - Yellow eels in spring | 1.1834  | 0.2366       | 1.0000     |
| Silver eels in winter - Yellow eels in spring | 2.9821  | 0.0029       | 0.0286     |
| Yellow eels in autumn - Yellow eels in spring | -1.2828 | 0.1996       | 1.0000     |
| Silver eels in autumn - Yellow eels in summer | 2.2204  | 0.0264       | 0.2639     |
| Silver eels in winter - Yellow eels in summer | 3.8737  | 0.0001       | 0.0010     |
| Yellow eels in autumn - Yellow eels in summer | 0.0294  | 0.9765       | 1.0000     |

**Supplementary Table S2.** Comparison of OI for yellow and silver eels in different seasons using Dunn's multiple comparison post hoc test.

| comparison                                            | Z       | p unadjusted | p adjusted |
|-------------------------------------------------------|---------|--------------|------------|
| Silver eels in autumn - Silver eels in winter         | -1.0381 | 0.2992       | 1.0000     |
| Silver eels in autumn - Yellow eels in autumn         | 4.3395  | 0.0000       | 0.0001     |
| Silver eels in winter - Yellow eels in autumn         | 5.5806  | 0.0000       | 0.0000     |
| Silver eels in autumn - Yellow eels in spring         | 4.0415  | 0.0001       | 0.0005     |
| Silver eels in winter - Yellow eels in spring         | 5.3671  | 0.0000       | 0.0000     |
| Yellow eels in autumn - Yellow eels in spring         | -0.5988 | 0.5493       | 1.0000     |
| Silver eels in autumn - Yellow eels in summer         | 3.7299  | 0.0002       | 1.9153     |
| Silver eels in winter - Yellow eels in summer         | 4.8990  | <0.0001      | <0.0001    |
| Yellow eels in autumn - Yellow eels in summer         | -0.4786 | 0.6322       | 1.0000     |
| Yellow eels in the spring - Yellow eels in the summer | 0.0650  | 0.9482       | 1.0000     |

**Supplementary Table S3.** Comparison of W for yellow and silver eels in different seasons using Dunn's multiple comparison post hoc test.

| comparison                                        | Z       | p unadjusted | p adjusted |
|---------------------------------------------------|---------|--------------|------------|
| Silver eels in autumn - Yellow eels in autumn     | 2.2093  | 0.0272       | 0.2715     |
| Silver eels in autumn - Yellow eels in spring     | 1.0771  | 0.2814       | 1.0000     |
| Yellow eels in autumn - Yellow eels in the spring | -1.3646 | 0.1724       | 1.0000     |
| Silver eels in autumn - Yellow eels in summer     | 2.3851  | 0.0171       | 0.1708     |
| Yellow eels in autumn - Yellow eels in summer     | 0.2196  | 0.8262       | 1.0000     |
| Yellow eels in spring - Yellow eels in summer     | 1.5737  | 0.1155       | 1.0000     |
| Silver eels in autumn - Silver eels in winter     | -0.4193 | 0.6750       | 1.0000     |
| Yellow eels in the autumn - Silver eels in winter | -2.5897 | 0.0096       | 0.0961     |
| Yellow eels in spring - Silver eels in winter     | -1.5143 | 0.1300       | 1.0000     |
| Yellow eels in summer - Silver eels in winter     | -2.7562 | 0.0058       | 0.0585     |

**Supplementary Table S4.** ANOVA output for CF of yellow and silver eels in different seasons

|                                             | df | SS      | Mean Sq | f     | p     |
|---------------------------------------------|----|---------|---------|-------|-------|
| Yellow and silver eels in different seasons | 4  | 0.0025  | 0.0006  | 0.948 | 0.441 |
| Residuals                                   | 72 | 0.04624 | 0.0007  |       |       |

**Supplementary Table S5.** ANOVA output for HSI of yellow and silver eels in different seasons

|                                             | df | SS   | f     | p      |
|---------------------------------------------|----|------|-------|--------|
| Yellow and silver eels in different seasons | 4  | 1.86 | 3.106 | 0.0204 |
| Residuals                                   | 72 | 10.8 |       |        |

**Supplementary Table S6.** Comparison of HSI for yellow and silver eels in different seasons using Tukey's range post hoc test.

| Comparison                                  | diff    | lwe     | upr     | p adj  |
|---------------------------------------------|---------|---------|---------|--------|
| Yellow eels in autumn-Silver eels in autumn | -0.0335 | -0.4509 | 0.3840  | 0.9994 |
| Yellow eels in spring-Silver eels in autumn | 0.1168  | -0.2657 | 0.4993  | 0.9123 |
| Yellow eels in summer-Silver eels in autumn | -0.1035 | -0.5286 | 0.3217  | 0.9600 |
| Silver eels in winter-Silver eels in autumn | -0.3253 | -0.7300 | 0.0794  | 0.1737 |
| Yellow eels in spring-Yellow eels in autumn | 0.1503  | -0.2237 | 0.5242  | 0.7931 |
| Yellow eels in summer-Yellow eels in autumn | -0.0700 | -0.4874 | 0.3475  | 0.9899 |
| Silver eels in winter-Yellow eels in autumn | -0.2919 | -0.6885 | 0.1048  | 0.2493 |
| Yellow eels in summer-Yellow eels in spring | -0.2203 | -0.6027 | 0.1622  | 0.4952 |
| Silver eels in winter-Yellow eels in spring | -0.4421 | -0.8018 | -0.0825 | 0.0084 |
| Silver eels in winter-Yellow eels in summer | -0.2219 | -0.6266 | 0.1828  | 0.5441 |
